# Supplementary material for: The Human Proteoform Atlas: a FAIR community resource for experimentally derived proteoforms
Source: PubMed Central journal article supplement — Nucleic Acids Res. 2021 Nov 19;50(D1):D526–33. doi: 10.1093/nar/gkab1086 (PMC8728143; doi:10.1093/nar/gkab1086), 2021-11-19
Supplement: gkab1086_supplemental_file.pdf [file gkab1086_supplemental_file.pdf]

## Supplementary Data

# The Human Proteoform Atlas: A FAIR community resource for experimentally derived proteoforms

Michael A. R. Hollas<sup>1</sup>, Matthew T. Robey<sup>1</sup>, Ryan T. Fellers<sup>1</sup>, Richard D. LeDuc<sup>1</sup>, Paul M. Thomas<sup>1</sup> and Neil L. Kelleher<sup>1</sup>

<sup>1</sup> Departments of Molecular Biosciences, Chemistry, and the Chemistry of Life Processes Institute, Northwestern University, Evanston, IL, 60208, USA

**Table S1.** Datasets currently contained in the Human Proteoform Atlas.

| PI             | Dataset Title                                                                                                                                                                      | Year | Enhanced? | Proteins | Proteoforms | PMIDs    | Refs |
|----------------|------------------------------------------------------------------------------------------------------------------------------------------------------------------------------------|------|-----------|----------|-------------|----------|------|
| C. Borges      | Gamma-carboxylation and fragmentation of osteocalcin in human serum defined by mass spectrometry                                                                                   | 2015 |           | 1        | 13          | 25855755 | (1)  |
| C. Hirtz       | Identification of multiple proteoforms biomarkers on clinical samples by routine Top-Down approaches                                                                               | 2018 |           | 3        | 7           | 29900270 | (2)  |
| C. Hendrickson | Identification and Characterization of Human Proteoforms by Top-Down LC-21 Tesla FT-ICR Mass Spectrometry                                                                          | 2017 |           | 591      | 805         | 27936753 | (3)  |
| D. Strasser    | Immunoaffinity Targeted Mass Spectrometry Analysis of Human Plasma Samples Reveals an Imbalance of Active and Inactive CXCL10 in Primary Sjögren's Syndrome Disease Patients       | 2020 |           | 1        | 2           | 32870689 | (4)  |
| D. Nedelkov    | Mass Spectrometric Immunoassay for the qualitative and quantitative analysis of the cytokine Macrophage Migration Inhibitory Factor (MIF)                                          | 2014 |           | 1        | 3           | 25328446 | (5)  |
| D. Nedelkov    | The association of plasma cystatin C proteoforms with diabetic chronic kidney disease                                                                                              | 2016 |           | 1        | 5           | 27019641 | (6)  |
| D. Nedelkov    | Quantitative mass spectrometric immunoassay for the chemokine RANTES and its variants                                                                                              | 2015 |           | 1        | 11          | 25549571 | (7)  |
| D. Nedelkov    | The Association of Human Apolipoprotein C-III Sialylation Proteoforms with Plasma Triglycerides                                                                                    | 2015 |           | 3        | 7           | 26633899 | (8)  |
| D. Nedelkov    | Development of quantitative mass spectrometric immunoassay for Serum Amyloid A                                                                                                     | 2016 |           | 3        | 15          | 27308834 | (9)  |
| F. Benavente   | A chemometric approach for characterization of serum transthyretin in familial amyloidotic polyneuropathy type I (FAP-I) by electrospray ionization-ion mobility mass spectrometry | 2018 |           | 1        | 2           | 29426546 | (10) |

|             |                                                                                                                                                                  |      |   |      |       |          |      |
|-------------|------------------------------------------------------------------------------------------------------------------------------------------------------------------|------|---|------|-------|----------|------|
| F. Becher   | Top-Down and Bottom-Up Proteomics of Circulating S100A8/S100A9 in Plasma of Septic Shock Patients                                                                | 2020 |   | 2    | 4     | 31913637 | (11) |
| H. Yassine  | Posttranslational modifications of apolipoprotein A-II proteoforms in type 2 diabetes                                                                            | 2017 |   | 1    | 3     | 27578111 | (12) |
| I. Messina  | Proteomic investigation of whole saliva in Wilson's disease                                                                                                      | 2015 |   | 21   | 42    | 26254010 | (13) |
| J. Brodbelt | High-Throughput Analysis of Intact Human Proteins Using UVPD and HCD on an Orbitrap Mass Spectrometer                                                            | 2017 | * | 299  | 1166  | 28412815 | (14) |
| L. Sun      | Toward a Universal Sample Preparation Method for Denaturing Top-Down Proteomics of Complex Proteomes                                                             | 2020 |   | 252  | 543   | 32419461 | (15) |
| L. Smith    | Constructing Human Proteoform Families Using Intact-Mass and Top-Down Proteomics with a Multi-Protease Global Post-Translational Modification Discovery Database | 2020 | * | 418  | 2301  | 31479276 | (16) |
| L. Smith    | Construction of Human Proteoform Families from 21 Tesla Fourier Transform Ion Cyclotron Resonance Mass Spectrometry Top-Down Proteomic Data                      | 2020 | * | 374  | 1666  | 33074679 | (17) |
| N. Kelleher | Haematopoietic proteoforms (unpublished)                                                                                                                         | 2021 | * | 1724 | 27660 | -        | -    |
| N. Kelleher | Quantitation and Identification of Thousands of Human Proteoforms below 30 kDa                                                                                   | 2016 |   | 1274 | 5936  | 26795204 | (18) |
| N. Kelleher | Evaluation of the compact high-field orbitrap for top-down proteomics of human cells                                                                             | 2012 |   | 670  | 672   | 22746247 | (19) |
| N. Kelleher | Integrated Bottom-Up and Top-Down Proteomics of Patient-Derived Breast Tumor Xenografts                                                                          | 2016 |   | 725  | 3747  | 26503891 | (20) |
| N. Kelleher | Advancing top-down analysis of the human proteome using a benchtop quadrupole-Orbitrap mass spectrometer                                                         | 2017 | * | 454  | 1855  | 28152595 | (21) |
| N. Young    | Quantitative Mass Spectrometry Reveals that Intact Histone H1 Phosphorylations are Variant Specific and Exhibit Single Molecule Hierarchical Dependence          | 2016 |   | 3    | 15    | 26209608 | (22) |
| P. Reaven   | Disialylated apolipoprotein C-III proteoform is associated with improved lipids in prediabetes and type 2 diabetes                                               | 2016 |   | 1    | 5     | 26945091 | (23) |
| P. Lescuyer | Identification of hemoglobin variants by top-down mass spectrometry using selected diagnostic product ions                                                       | 2015 |   | 1    | 5     | 25753013 | (24) |
| R. Oliva    | Characterization of Human Sperm Protamine Proteoforms through a Combination of Top-Down and Bottom-Up Mass Spectrometry Approaches                               | 2020 |   | 2    | 24    | 31703166 | (25) |
| S. Wu       | Deep Intact Proteoform Characterization in Human Cell Lysate Using High-pH and Low-pH Reversed-Phase Liquid Chromatography                                       | 2019 |   | 658  | 2726  | 31755044 | (26) |
| T. Cabras   | RP-HPLC-ESI-IT Mass Spectrometry Reveals Significant Variations of the Human Salivary Protein Profile Associated with Predominantly Antibody Deficiencies        | 2020 | * | 29   | 250   | 31916122 | (27) |

|               |                                                                                                                                                                 |      |      |      |          |      |
|---------------|-----------------------------------------------------------------------------------------------------------------------------------------------------------------|------|------|------|----------|------|
| V. Sanz-Nebot | On-line immunoaffinity solid-phase extraction capillary electrophoresis mass spectrometry using Fab' antibody fragments for the analysis of serum transthyretin | 2017 | 1    | 7    | 28501163 | (28) |
| V. Sanz-Nebot | Comparison of capillary electrophoresis and capillary liquid chromatography coupled to mass spectrometry for the analysis of transthyretin in human serum       | 2016 | 1    | 14   | 27052822 | (29) |
| V. Sanz-Nebot | Analysis of serum transthyretin by on-line immunoaffinity solid-phase extraction capillary electrophoresis mass spectrometry using magnetic beads               | 2016 | 1    | 6    | 26842820 | (30) |
| Y. Ge         | (Skeletal muscle) Dissecting human skeletal muscle troponin proteoforms by top-down mass spectrometry                                                           | 2015 | 4    | 6    | 25613324 | (31) |
| Y. Ge         | (Vastus lateralis) Dissecting human skeletal muscle troponin proteoforms by top-down mass spectrometry                                                          | 2015 | 7    | 12   | 25613324 | (31) |
| Y. Ge         | (Tibialis anterior) Dissecting human skeletal muscle troponin proteoforms by top-down mass spectrometry                                                         | 2015 | 7    | 10   | 25613324 | (31) |
| Y. Zhu        | Sensitive Top-Down Proteomics Analysis of a Low Number of Mammalian Cells Using a Nanodroplet Sample Processing Platform                                        | 2020 | 1655 | 2735 | 32374172 | (32) |

## REFERENCES

1. Rehder, D.S., Gundberg, C.M., Booth, S.L. and Borges, C.R. (2015) Gamma-carboxylation and fragmentation of osteocalcin in human serum defined by mass spectrometry. *Mol Cell Proteomics*, **14**, 1546-1555.
2. Vialaret, J., Schmit, P.O., Lehmann, S., Gabelle, A., Wood, J., Bern, M., Paape, R., Suckau, D., Kruppa, G. and Hirtz, C. (2018) Identification of multiple proteoforms biomarkers on clinical samples by routine Top-Down approaches. *Data Brief*, **18**, 1013-1021.
3. Anderson, L.C., DeHart, C.J., Kaiser, N.K., Fellers, R.T., Smith, D.F., Greer, J.B., LeDuc, R.D., Blakney, G.T., Thomas, P.M., Kelleher, N.L. *et al.* (2017) Identification and Characterization of Human Proteoforms by Top-Down LC-21 Tesla FT-ICR Mass Spectrometry. *J Proteome Res*, **16**, 1087-1096.
4. Schmidt, A., Farine, H., Keller, M.P., Sebastian, A., Kozera, L., Welford, R.W.D. and Strasser, D.S. (2020) Immunoaffinity Targeted Mass Spectrometry Analysis of Human Plasma Samples Reveals an Imbalance of Active and Inactive CXCL10 in Primary Sjögren's Syndrome Disease Patients. *J Proteome Res*, **19**, 4196-4209.
5. Sherma, N.D., Borges, C.R., Trenchevska, O., Jarvis, J.W., Rehder, D.S., Oran, P.E., Nelson, R.W. and Nedelkov, D. (2014) Mass Spectrometric Immunoassay for the qualitative and quantitative analysis of the cytokine Macrophage Migration Inhibitory Factor (MIF). *Proteome Sci*, **12**, 52.
6. Yassine, H.N., Trenchevska, O., Dong, Z., Bashawri, Y., Koska, J., Reaven, P.D., Nelson, R.W. and Nedelkov, D. (2016) The association of plasma cystatin C proteoforms with diabetic chronic kidney disease. *Proteome Sci*, **14**, 7.
7. Trenchevska, O., Sherma, N.D., Oran, P.E., Reaven, P.D., Nelson, R.W. and Nedelkov, D. (2015) Quantitative mass spectrometric immunoassay for the chemokine RANTES and its variants. *J Proteomics*, **116**, 15-23.
8. Yassine, H.N., Trenchevska, O., Ramrakhiani, A., Parekh, A., Koska, J., Walker, R.W., Billheimer, D., Reaven, P.D., Yen, F.T., Nelson, R.W. *et al.* (2015) The Association of Human Apolipoprotein C-III Sialylation Proteoforms with Plasma Triglycerides. *PLoS One*, **10**, e0144138.

9. Trenchevska, O., Yassine, H.N., Borges, C.R., Nelson, R.W. and Nedelkov, D. (2016) Development of quantitative mass spectrometric immunoassay for serum amyloid A. *Biomarkers*, **21**, 743-751.
10. Pont, L., Sanz-Nebot, V., Vilaseca, M., Jaumot, J., Tauler, R. and Benavente, F. (2018) A chemometric approach for characterization of serum transthyretin in familial amyloidotic polyneuropathy type I (FAP-I) by electrospray ionization-ion mobility mass spectrometry. *Talanta*, **181**, 87-94.
11. Dubois, C., Payen, D., Simon, S., Junot, C., Fenaille, F., Morel, N. and Becher, F. (2020) Top-Down and Bottom-Up Proteomics of Circulating S100A8/S100A9 in Plasma of Septic Shock Patients. *J Proteome Res*, **19**, 914-925.
12. Azizkhanian, I., Trenchevska, O., Bashawri, Y., Hu, J., Koska, J., Reaven, P.D., Nelson, R.W., Nedelkov, D. and Yassine, H.N. (2016) Posttranslational modifications of apolipoprotein A-II proteoforms in type 2 diabetes. *J Clin Lipidol*, **10**, 808-815.
13. Cabras, T., Sanna, M., Manconi, B., Fanni, D., Demelia, L., Sorbello, O., Iavarone, F., Castagnola, M., Faa, G. and Messana, I. (2015) Proteomic investigation of whole saliva in Wilson's disease. *J Proteomics*, **128**, 154-163.
14. Cleland, T.P., DeHart, C.J., Fellers, R.T., VanNispen, A.J., Greer, J.B., LeDuc, R.D., Parker, W.R., Thomas, P.M., Kelleher, N.L. and Brodbelt, J.S. (2017) High-Throughput Analysis of Intact Human Proteins Using UVPD and HCD on an Orbitrap Mass Spectrometer. *J Proteome Res*, **16**, 2072-2079.
15. Yang, Z., Shen, X., Chen, D. and Sun, L. (2020) Toward a Universal Sample Preparation Method for Denaturing Top-Down Proteomics of Complex Proteomes. *J Proteome Res*, **19**, 3315-3325.
16. Dai, Y., Buxton, K.E., Schaffer, L.V., Miller, R.M., Millikin, R.J., Scalf, M., Frey, B.L., Shortreed, M.R. and Smith, L.M. (2019) Constructing Human Proteoform Families Using Intact-Mass and Top-Down Proteomics with a Multi-Protease Global Post-Translational Modification Discovery Database. *J Proteome Res*, **18**, 3671-3680.
17. Schaffer, L.V., Anderson, L.C., Butcher, D.S., Shortreed, M.R., Miller, R.M., Pavelec, C. and Smith, L.M. (2021) Construction of Human Proteoform Families from 21 Tesla Fourier Transform Ion Cyclotron Resonance Mass Spectrometry Top-Down Proteomic Data. *J Proteome Res*, **20**, 317-325.
18. Durbin, K.R., Fornelli, L., Fellers, R.T., Doubleday, P.F., Narita, M. and Kelleher, N.L. (2016) Quantitation and Identification of Thousands of Human Proteoforms below 30 kDa. *J Proteome Res*, **15**, 976-982.
19. Ahlf, D.R., Compton, P.D., Tran, J.C., Early, B.P., Thomas, P.M. and Kelleher, N.L. (2012) Evaluation of the compact high-field orbitrap for top-down proteomics of human cells. *J Proteome Res*, **11**, 4308-4314.
20. Ntai, I., LeDuc, R.D., Fellers, R.T., Erdmann-Gilmore, P., Davies, S.R., Rumsey, J., Early, B.P., Thomas, P.M., Li, S., Compton, P.D. *et al.* (2016) Integrated Bottom-Up and Top-Down Proteomics of Patient-Derived Breast Tumor Xenografts. *Mol Cell Proteomics*, **15**, 45-56.
21. Fornelli, L., Durbin, K.R., Fellers, R.T., Early, B.P., Greer, J.B., LeDuc, R.D., Compton, P.D. and Kelleher, N.L. (2017) Advancing Top-down Analysis of the Human Proteome Using a Benchtop Quadrupole-Orbitrap Mass Spectrometer. *J Proteome Res*, **16**, 609-618.
22. Chen, Y., Hoover, M.E., Dang, X., Shomo, A.A., Guan, X., Marshall, A.G., Freitas, M.A. and Young, N.L. (2016) Quantitative Mass Spectrometry Reveals that Intact Histone H1 Phosphorylations are Variant Specific and Exhibit Single Molecule Hierarchical Dependence. *Mol Cell Proteomics*, **15**, 818-833.
23. Koska, J., Yassine, H., Trenchevska, O., Sinari, S., Schwenke, D.C., Yen, F.T., Billheimer, D., Nelson, R.W., Nedelkov, D. and Reaven, P.D. (2016) Disialylated apolipoprotein C-III proteoform is associated with improved lipids in prediabetes and type 2 diabetes. *J Lipid Res*, **57**, 894-905.
24. Coelho Graça, D., Hartmer, R., Jabs, W., Beris, P., Clerici, L., Stoermer, C., Samii, K., Hochstrasser, D., Tsybin, Y.O., Scherl, A. *et al.* (2015) Identification of hemoglobin variants by top-down mass spectrometry using selected diagnostic product ions. *Anal Bioanal Chem*, **407**, 2837-2845.
25. Soler-Ventura, A., Gay, M., Jodar, M., Vilanova, M., Castillo, J., Arauz-Garofalo, G., Villarreal, L., Ballescà, J.L., Vilaseca, M. and Oliva, R. (2020) Characterization of Human Sperm Protamine

- Proteoforms through a Combination of Top-Down and Bottom-Up Mass Spectrometry Approaches. *J Proteome Res*, **19**, 221-237.
26. Yu, D., Wang, Z., Cupp-Sutton, K.A., Liu, X. and Wu, S. (2019) Deep Intact Proteoform Characterization in Human Cell Lysate Using High-pH and Low-pH Reversed-Phase Liquid Chromatography. *J Am Soc Mass Spectrom*, **30**, 2502-2513.
  27. Contini, C., Firinu, D., Serrao, S., Manconi, B., Olianias, A., Cinetto, F., Cossu, F., Castagnola, M., Messina, I., Del Giacco, S. *et al.* (2020) RP-HPLC-ESI-IT Mass Spectrometry Reveals Significant Variations of the Human Salivary Protein Profile Associated with Predominantly Antibody Deficiencies. *J Clin Immunol*, **40**, 329-339.
  28. Pont, L., Benavente, F., Barbosa, J. and Sanz-Nebot, V. (2017) On-line immunoaffinity solid-phase extraction capillary electrophoresis mass spectrometry using Fab´antibody fragments for the analysis of serum transthyretin. *Talanta*, **170**, 224-232.
  29. Pont, L., Poturcu, K., Benavente, F., Barbosa, J. and Sanz-Nebot, V. (2016) Comparison of capillary electrophoresis and capillary liquid chromatography coupled to mass spectrometry for the analysis of transthyretin in human serum. *J Chromatogr A*, **1444**, 145-153.
  30. Peró-Gascón, R., Pont, L., Benavente, F., Barbosa, J. and Sanz-Nebot, V. (2016) Analysis of serum transthyretin by on-line immunoaffinity solid-phase extraction capillary electrophoresis mass spectrometry using magnetic beads. *Electrophoresis*, **37**, 1220-1231.
  31. Chen, Y.C., Sumandea, M.P., Larsson, L., Moss, R.L. and Ge, Y. (2015) Dissecting human skeletal muscle troponin proteoforms by top-down mass spectrometry. *J Muscle Res Cell Motil*, **36**, 169-181.
  32. Zhou, M., Uwugiaren, N., Williams, S.M., Moore, R.J., Zhao, R., Goodlett, D., Dapic, I., Paša-Tolić, L. and Zhu, Y. (2020) Sensitive Top-Down Proteomics Analysis of a Low Number of Mammalian Cells Using a Nanodroplet Sample Processing Platform. *Anal Chem*, **92**, 7087-7095.
